# Supplementary material for: The Correlation between Periodontal Parameters and Cell-Free DNA in the Gingival Crevicular Fluid, Saliva, and Plasma in Chinese Patients: A Cross-Sectional Study
Source: MDPI journal article supplement (doi:10.3390/jcm11236902), 2022-11-23
Supplement: s1 [file s1]

**Table S1.** Multivariate analysis of age, sex and clinical parameters on cfDNA concentrations

| Parameter estimates ( $\beta$ value) <sup>a</sup> |                     |                     |                     |                     |                     |                     |                     |                                     |
|---------------------------------------------------|---------------------|---------------------|---------------------|---------------------|---------------------|---------------------|---------------------|-------------------------------------|
|                                                   |                     | Variables           |                     |                     |                     |                     |                     |                                     |
|                                                   |                     | Age                 | Sex                 | Clinical parameters |                     |                     |                     |                                     |
| Samples                                           | Intercept           | (years)             | (M=1; F=0)          | Mean PD             | Max PD              | BOP                 | Mean PI             | (R <sup>2</sup> value) <sup>b</sup> |
| GCF                                               | -399.4              | 6.417               | -10.39              | 185.6               |                     |                     |                     | 0.449                               |
| (ng/ul                                            | ( <i>p</i> < 0.001) | ( <i>p</i> = 0.044) | ( <i>p</i> = 0.815) | ( <i>p</i> < 0.001) |                     |                     |                     |                                     |
| per 30-s                                          | -172.3              | 2.870               | -20.97              |                     | 78.04               |                     |                     | 0.471                               |
| sample)                                           | ( <i>p</i> = 0.581) | ( <i>p</i> = 0.387) | ( <i>p</i> = 0.629) |                     | ( <i>p</i> < 0.001) |                     |                     |                                     |
|                                                   | -189.7              | 8.500               | -9.607              |                     |                     | 5.080               |                     | 0.513                               |
|                                                   | ( <i>p</i> = 0.031) | ( <i>p</i> = 0.003) | ( <i>p</i> = 0.817) |                     |                     | ( <i>p</i> < 0.001) |                     |                                     |
|                                                   | -195.9              | 8.050               | -25.29              |                     |                     |                     | 206.2               | 0.392                               |
|                                                   | ( <i>p</i> = 0.046) | ( <i>p</i> = 0.015) | ( <i>p</i> = 0.588) |                     |                     |                     | ( <i>p</i> < 0.001) |                                     |
| Saliva                                            | -94.28              | 3.177               | -60.14              | 114.6               |                     |                     |                     | 0.505                               |
| (ng/ml)                                           | ( <i>p</i> = 0.107) | ( <i>p</i> = 0.080) | ( <i>p</i> = 0.019) | ( <i>p</i> < 0.001) |                     |                     |                     |                                     |
|                                                   | 47.33               | 1.355               | -66.12              |                     | 7.053               |                     |                     | 0.497                               |
|                                                   | ( <i>p</i> = 0.372) | ( <i>p</i> = 0.487) | ( <i>p</i> = 0.011) |                     | ( <i>p</i> < 0.001) |                     |                     |                                     |
|                                                   | 39.22               | 4.834               | -59.29              |                     |                     | 2.794               |                     | 0.501                               |
|                                                   | ( <i>p</i> = 0.458) | ( <i>p</i> = 0.006) | ( <i>p</i> = 0.022) |                     |                     | ( <i>p</i> < 0.001) |                     |                                     |
|                                                   | 33.73               | 4.400               | -68.58              |                     |                     |                     | 119.9               | 0.420                               |
|                                                   | ( <i>p</i> = 0.555) | ( <i>p</i> = 0.024) | ( <i>p</i> = 0.014) |                     |                     |                     | ( <i>p</i> < 0.001) |                                     |
| Plasma                                            | 134.5               | 1.709               | 25.79               | 35.21               |                     |                     |                     | 0.128                               |
| (ng/ml)                                           | ( <i>p</i> = 0.008) | ( <i>p</i> = 0.265) | ( <i>p</i> = 0.232) | ( <i>p</i> = 0.019) |                     |                     |                     |                                     |
|                                                   | 178.2               | 1.191               | 24.02               |                     | 13.72               |                     |                     | 0.124                               |
|                                                   | ( <i>p</i> < 0.001) | ( <i>p</i> = 0.470) | ( <i>p</i> = 0.268) |                     | ( <i>p</i> = 0.024) |                     |                     |                                     |
|                                                   | 180.5               | 2.672               | 26.51               |                     |                     | 0.4388              |                     | 0.080                               |
|                                                   | ( <i>p</i> < 0.001) | ( <i>p</i> = 0.077) | ( <i>p</i> = 0.232) |                     |                     | ( <i>p</i> = 0.242) |                     |                                     |
|                                                   | 177.7               | 2.425               | 24.41               |                     |                     |                     | 25.02               | 0.084                               |
|                                                   | ( <i>p</i> < 0.001) | ( <i>p</i> = 0.118) | ( <i>p</i> = 0.271) |                     |                     |                     | ( <i>p</i> = 0.189) |                                     |

Abbreviations: cfDNA, cell-free DNA; GCF, gingival crevicular fluid; PD, probing depth; BOP, bleeding on probing; PI, plaque index; M, male; F, female.

<sup>a,b</sup>Multiple linear regression;  $n = 81$ .
